# Supplementary material for: De novo transcriptome sequencing and analysis of male, pseudo-male and female yellow perch, Perca flavescens
Source: PLoS One. 2017 Feb 3;12(2):e0171187. doi: 10.1371/journal.pone.0171187 (PMC5291366; doi:10.1371/journal.pone.0171187)
Supplement: S4 Table — (XLSX) [file pone.0171187.s004.xlsx]

## Sheet: Sheet1
S4 Table. Sex specifically expressed genes identified in male and pseudo-male.
Gene	Blast hit align length	Sequence discription	Protein	Accession number	Sex
LOC103910175	265	gtpase imap family member 8-like isoform x1	GTPase IMAP family member 8-like	XP_009297299	Pseudo-male
pcdh11	311	protocadherin-11 x-linked isoform x2	protocadherin-11 X-linked isoform X2	XP_005173247	Pseudo-male
bglap	325	osteocalcin precursor	osteocalcin precursor	NP_001077326	Pseudo-male
LOC103910165	280	PREDICTED: uncharacterized protein LOC103910165	uncharacterized protein LOC103910165	XP_009297279	Pseudo-male
zgc:158624	291	transmembrane protein c15orf27 homolog	transmembrane protein C15orf27 homolog	NP_001074141	Male
LOC100001360	375	PREDICTED: alpha-tectorin-like	alpha-tectorin-like	XP_001336393	Male
LOC101883665	445	PREDICTED: uncharacterized protein LOC101883665	uncharacterized protein LOC101883665	XP_009292548	Male
drd2b	390	dopamine receptor d2b isoform x1	dopamine receptor D2b isoform X1	XP_009300113	Male
LOC793599	287	clock-controlled protein 8-like	clock-controlled protein 8-like	XP_001333401	Male
si:dkey-245p14.4	270	uncharacterized protein LOC563576	uncharacterized protein LOC563576	NP_001108320	Male
obscn	244	low quality protein: obscurin	obscurin	XP_009302158	Male
eng1b	590	homeobox protein engrailed-1	homeobox protein engrailed-1	NP_001013516	Male
LOC100000685	337	solute carrier family 22 member 4	solute carrier family 22 member 4	XP_009294016	Male
gdf6a	288	growth differentiation factor 6-a precursor	growth/differentiation factor 6-A precursor	NP_001153466	Male
LOC565163	413	trypsin i-p1-like	trypsin-3-like	XP_693540	Male
epb41l3a	247	band -like protein 3	band 4.1-like protein 3	NP_001003987	Male
abcc12	264	multidrug resistance-associated protein 5	multidrug resistance-associated protein 9	XP_696904	Male
syt12	210	synaptotagmin-12	synaptotagmin-12	NP_001122205	Male
hal	318	histidine ammonia-lyase	histidine ammonia-lyase	NP_001082926	Male
LOC101887055	632	PREDICTED: uncharacterized protein LOC101887055	uncharacterized protein LOC101887055	XP_005161692	Male
LOC101883824	244	PREDICTED: uncharacterized protein LOC101883824	uncharacterized protein LOC101883824	XP_009299181	Male
si:ch211-234p18.3	319	ras-specific guanine nucleotide-releasing factor 1 isoform x1	ras-specific guanine nucleotide-releasing factor 1 isoform X1	XP_009291904	Male
LOC103910165	225	PREDICTED: uncharacterized protein LOC103910165	uncharacterized protein LOC103910165	XP_009297279	Male
arhgap22	240	rho gtpase-activating protein 22 isoform x2	rho GTPase-activating protein 22 isoform X2	XP_690970	Male
LOC103911069	443	PREDICTED: uncharacterized protein K02A2.6-like	uncharacterized protein K02A2.6-like	XP_009299712	Male
ptpdc1a	251	protein tyrosine phosphatase domain-containing protein 1	protein tyrosine phosphatase domain-containing protein 1	NP_001074065	Male
nrxn3a	491	neurexin 3a precursor	neurexin 3a precursor	NP_001073478	Male
LOC100000804	230	regulating synaptic membrane exocytosis protein 2-like	regulating synaptic membrane exocytosis protein 2-like	XP_001340931	Male
nwd1	364	nacht and wd repeat domain-containing protein 1 isoform x1	NACHT and WD repeat domain-containing protein 1 isoform X1	XP_009304095	Male
LOC101884834	221	PREDICTED: uncharacterized protein LOC101884834	uncharacterized protein LOC101884834	XP_009295412	Male
si:rp71-39b20.4	244	potassium voltage-gated channel subfamily v member 2	potassium voltage-gated channel subfamily V member 2	XP_005171298	Male
ubap1l	214	ubiquitin-associated protein 1-like isoform x2	ubiquitin-associated protein 1-like isoform X2	XP_009298322	Male
LOC568844	223	gastrula zinc finger	zinc finger protein 696-like isoform X2	XP_005158205	Male
LOC103909606	260	PREDICTED: uncharacterized protein LOC103909606	uncharacterized protein LOC103909606	XP_009294695	Male
prokr1a	395	prokineticin receptor 2 isoform x1	prokineticin receptor 2 isoform X1	XP_005160184	Male
xkr6b	363	xk-related protein 6	XK-related protein 6	NP_001012257	Male
gpr20	342	g-protein coupled receptor 20	G-protein coupled receptor 20	XP_009290746	Male
LOC103910603	274	PREDICTED: uncharacterized protein LOC103910603	uncharacterized protein LOC103910603	XP_009298874	Male
LOC103911666	312	PREDICTED: uncharacterized protein LOC103911666	uncharacterized protein LOC103911666	XP_009303067	Male
gmnc	291	geminin coiled-coil domain-containing protein 1 isoform x1	geminin coiled-coil domain-containing protein 1 isoform X1	XP_009290113	Male
LOC100148988	326	kalirin isoform x6	kalirin isoform X6	XP_009302730	Male
LOC101883582	261	regulating synaptic membrane exocytosis protein 2- partial	regulating synaptic membrane exocytosis protein 2-like	XP_005173588	Male
trpm3	263	transient receptor potential cation channel subfamily m member 3 isoform x5	transient receptor potential cation channel subfamily M member 3 isoform X5	XP_005171985	Male
sst3	333	cortistatin precursor	cortistatin precursor	NP_001038896	Male
LOC553308	227	sterile alpha motif domain-containing protein 3	uncharacterized protein LOC553308 isoform X1	XP_009292857	Male
LOC103911441	313	PREDICTED: uncharacterized protein LOC103911441	uncharacterized protein LOC103911441	XP_009301878	Male
grm6b	302	glutamate metabotropic 6b	glutamate receptor, metabotropic 6b	NP_001073489	Male
cnnm4	273	metal transporter partial	metal transporter CNNM4	XP_009296642	Male
col6a3	307	collagen alpha-3 chain isoform x2	collagen alpha-3(VI) chain isoform X2	XP_009302964	Male
RETGC-2	247	guanylyl cyclase 3 isoform x2	retinal guanylyl cyclase 2 isoform X1	XP_005166557	Male
LOC103280496	343	PREDICTED: uncharacterized protein LOC103280496	uncharacterized protein LOC103280496	XP_008117934	Male
crb2a	343	protein crumbs homolog 2	protein crumbs homolog 2	NP_001038764	Male
LOC570738	333	PREDICTED: uncharacterized protein LOC570738 isoform X1	uncharacterized protein LOC570738 isoform X1	XP_005166325	Male
kcnh6a	226	potassium voltage-gated channel subfamily h member 6 isoform x3	potassium voltage-gated channel subfamily H member 6 isoform X3	XP_005164065	Male
grk7a	320	g-protein-coupled receptor kinase 7a	G-protein-coupled receptor kinase 7A	NP_001027011	Male
LOC100536041	296	gamma-aminobutyric acid receptor subunit beta-2-like	gamma-aminobutyric acid receptor subunit beta-2-like	XP_003200951	Male
nr2e1	229	nuclear receptor subfamily 2 group e member 1	nuclear receptor subfamily 2 group E member 1	NP_001003608	Male
csmd1	276	cub and sushi domain-containing protein 3	LOW QUALITY PROTEIN: CUB and sushi domain-containing protein 1	XP_009305370	Male
zgc:158463	204	uncharacterized protein LOC100037361	uncharacterized protein LOC100037361	NP_001091866	Male
